# Supplementary material for: Metabolic and non-metabolic liver zonation is established non-synchronously and requires sinusoidal Wnts
Source: eLife. 2020 Mar 10;9:e46206. doi: 10.7554/eLife.46206 (PMC7067564; doi:10.7554/eLife.46206)
Supplement: Figure 1—source data 1. [file elife-46206-fig1-data1.xlsx]

## Sheet: Figure 1D
Figure 1D
GS+ area
P2	P15	P30
5.6613	1.091	3.0198
6.468	1.7869	5.1169
7.4461	1.0913	2.4719
13.1652	3.8638	8.3205
8.3873	4.1792	4.207
4.3669	1.0426	3.7919
10.8787	1.2623	3.348
17.9029	1.2207	1.6681
3.0101	2.2884	2.5863
		2.1348
		2.199
		2.5135
		2.5918
Cyp2e1+ area
P2	P15	P30
8.277	8.2288	10.8602
7.0216	8.4066	5.7576
9.4672	20.506	11.5804
14.0737	9.1415	9.7331
6.5123	12.0135	8.855
11.7343	8.9975	34.1636
10.781	8.3916	22.6519
17.488	7.6966	18.877
8.2284	14.4615	6.4709
	8.6463	7.8407
		14.6003
		16.293
GFP+ area
P2	P15	P30
4.9005	5.4437	10.2678
3.8694	3.7977	5.7354
4.6235	14.9487	10.9653
6.9814	4.9058	8.502
4.5604	6.6673	8.4921
6.4209	5.0485	29.5596
5.6402	5.7502	21.673
10.5053	4.2166	18.544
6.6989	11.6275	6.4387
	5.5226	7.2666
		13.1689
		16.0024
(GFP+/Cyp2e1+)area
P2	P15	P30
59.2062	66.1542	94.5452
55.1071	45.1752	88.2175
48.837	72.8992	91.7958
49.606	53.6651	84.7317
70.0275	55.4984	95.9018
54.7191	56.11	86.5237
52.3161	68.5233	95.6785
60.0715	54.7852	98.236
81.4119	80.4031	99.5024
	63.8724	92.6779
		90.1961
		98.2164
