# Supplementary material for: Metabolic and non-metabolic liver zonation is established non-synchronously and requires sinusoidal Wnts
Source: eLife. 2020 Mar 10;9:e46206. doi: 10.7554/eLife.46206 (PMC7067564; doi:10.7554/eLife.46206)
Supplement: Figure 2—source data 1. [file elife-46206-fig2-data1.xlsx]

## Sheet: Figure 2E
Figure 2E
GS area
Ctrl	Mut
1.0712	0.1778
1.3523	0.0692
1.438	0.1077
0.5361	0.1177
0.7968	0.1425
2.0128	0.183
1.666	0.0181
0.7912	0.0439
2.0769	0.0196
0.8403
1.6925
1.0919
Cyp2e1 area
Ctrl	Mut
14.4027	4.7921
14.7109	4.1941
13.0558	4.6651
10.2743	8.2666
15.5169	8.3668
18.8113	4.3839
4.3385	3.5443
19.15	7.1596
16.1669	3.1063
10.8615	3.3348
7.3725
GFP area
Ctrl	Mut
13.3822	4.4669
11.7013	3.9266
11.5034	3.9877
8.8059	7.6329
14.2477	7.2483
18.122	1.3431
4.1044	2.294
15.107	7.116
13.4171	2.5932
9.6792	2.2485
6.5278
