# Supplementary material for: Metabolic and non-metabolic liver zonation is established non-synchronously and requires sinusoidal Wnts
Source: eLife. 2020 Mar 10;9:e46206. doi: 10.7554/eLife.46206 (PMC7067564; doi:10.7554/eLife.46206)
Supplement: Figure 3—source data 1. [file elife-46206-fig3-data1.xlsx]

## Sheet: Figure 3C
Figure 3C
P2			P30
GS area			GS area
Ctrl	Mut		Ctrl	Mut
5.6613	3.1889		3.0198	1.6367
6.468	5.1498		5.1169	0.6092
7.4461	4.4863		2.4719	1.7542
13.1652	4.7433		8.3205	0.4677
8.3873	1.2125		4.207	0.5022
4.3669	5.1431		3.7919	0.0684
10.8787	5.3667		3.348	0.0648
17.9029	2.8554		1.6681	0.6055
3.0101	4.8547		2.5863	0.1689
	7.1896		2.1348	0.1924
	8.1775		2.199	0.5541
	3.3013		2.5135
			2.5918
Cyp2e1 area
Ctrl	Mut		Cyp2e1 area
8.277	6.24892		Ctrl	Mut
7.0216	5.818		10.8602	1.4734
9.4672	5.73572		5.7576	1.0962
14.0737	8.8708		11.5804	6.0043
6.5123	7.9926		9.7331	3.058
11.7343	11.9409		8.855	2.8606
10.781	17.3062		34.1636	1.1672
17.488	6.9458		22.6519	0.8718
8.2284	11.1992		18.877	1.9808
			6.4709	6.0801
GFP area			7.8407	7.4718
Ctrl	Mut		14.6003	3.8246
4.9005	5.35856		16.293	5.2292
3.8694	4.15152			1.9973
4.6235	2.73884			3.7416
6.9814	5.2864
4.5604	4.50468		GFP area
6.4209	6.4498		Ctrl	Mut
5.6402	9.71528		10.2678	1.3405
10.5053	3.78228		5.7354	1.0075
6.6989	5.38804		10.9653	5.3885
			8.502	1.9595
GFP/Cyp2e1 area			8.4921	1.3752
Ctrl	Mut		29.5596	0.6921
59.2062	85.7518		21.673	1.0251
55.1071	71.3565		18.544	1.4066
48.837	47.7506		6.4387	2.5024
49.606	59.5933		7.2666	6.2395
70.0275	56.3606		13.1689	1.9169
54.7191	54.0144		16.0024	2.1566
52.3161	56.1376			1.281
60.0715	54.4542			3.132
81.4119	48.1108
			GFP/Cyp2e1 area
			Ctrl	Mut
			94.5452	90.9801
			88.2175	91.9084
			91.7958	89.744
			84.7317	64.0778
			95.9018	59.2957
			86.5237	117.584
			95.6785	71.0117
			98.236	83.5073
			99.5024	64.1366
			92.6779	83.7075
			90.1961
			98.2164

## Sheet: Figure 3D
Figure 3D
	Ctrl			Mut
GS	1.01533	0.781987	0.795613	0.144544	0.114191	0.226944
Cyp2e1	0.964754	0.710794	0.714474	0.097461	0.197985	0.147666
Axin2	0.993584	0.693903	1.18145	0.186238	0.21205	0.256178
Cldn2	1.00441	0.944829	1.07682	0.411568	0.546441	0.54801
Tbx3	0.989357	0.752623	0.804667	0.262352	0.138237	0.574363
Apc	1.07501	1.11396	1.00666	1.21521	1.39225	1.44615
Cdh1	0.989433	0.825774	0.61204	1.47441	1.59737	1.79732
Prox1	1.00504	1.0297	0.92074	0.982422	1.07275	0.802629

## Sheet: Figure 3E
Figure 3E
Axin2
Control	CHIR99021	Wnt2	Wnt2+Rspo3	Wnt9b	Wnt9b+Rspo3
1.01909	170.366	2.3166	31.4439	3.2637	25.2977
1.0045	57.9597	1.2694	7.3892	0.3974	6.8692
1.08184	226.962	4.1304	26.2941	5.9604	5.9604
1.05371	367.792	0.9456	35.4801	1.02301	30.2943
1.02734	723.031	1.2557	89.1266	0.5728	20.8619
1.00844	368.874	1.3316	54.0794	1.1419	14.6333
Cyp2e1
Control	CHIR99021	Wnt2	Wnt2+Rspo3	Wnt9b	Wnt9b+Rspo3
1.00032	52.8031	1.7679	8.7398	5.07788	50.7894
1.00344	24.6516	1.9061	3.3578	0.3978	14.8296
1.0037	46.5502	2.3112	7.9376	2.3563	16.0519
1.01204	94.9693	1.3588	4.4626	1.8187	34.5316
1.00091	84.039	1.7571	1.319	0.7268	21.4631
1.01171	61.3563	1.1824	1.0415	1.3038	28.9721
Glul
Control	CHIR99021	Wnt2	Wnt2+Rspo3	Wnt9b	Wnt9b+Rspo3
1.00094	2.8764	1.15948	1.0356	2.2305	2.195
1.00162	1.9938	1.3046	0.8151	0.8154	2.5982
0.9552	4.1388	1.3282	0.9398	0.5833	1.0767
1.00021	2.6116	0.7209	0.9181	0.77829	1.04706
1.00019	3.3312	1.5951	0.8029	0.731385	1.08933
1.04286	2.1318	1.739	0.6287	1.17202	1.51014
Cldn2
Control	CHIR99021	Wnt2	Wnt2+Rspo3	Wnt9b	Wnt9b+Rspo3
1.00049	2.5144	0.7597	0.8185	2.1276	1.2078
1.0001	1.5683	0.88077	0.4994	1.21071	0.8052
1.00125	2.5788	0.92243	0.6552	0.4846	0.8807
1.00192	1.9868	0.6292	0.4785	1.01789	0.7707
1.00147	3.1302	0.966	1.6924	1.1319
1.00473	1.8351	0.80138	0.8999	0.766087
