# Supplementary material for: Metabolic and non-metabolic liver zonation is established non-synchronously and requires sinusoidal Wnts
Source: eLife. 2020 Mar 10;9:e46206. doi: 10.7554/eLife.46206 (PMC7067564; doi:10.7554/eLife.46206)
Supplement: Figure 4—source data 1. [file elife-46206-fig4-data1.xlsx]

## Sheet: Figure 4B
Figure 4B
ALT activity (mU/mL)
	Veh.			CCl4
Day 2	60.0341	57.3868	58.9751	526.48	529.656	434.885
Day 7	64.2696	49.9745	63.2107	52.0923	55.269	66.3875
AST activity (mU/mL)
	Veh.			CCL4
Day 2	25.4299	26.9181	32.251	141.389	94.385	114.848
Day 7	72.6815	25.926	61.0236	27.9103	58.5432	47.8775

## Sheet: Figure4E
Figure 4E
GS area
Day 2	Day 3	Day 5	Day 7
0	2.6597	7.4961	11.5199
0	3.5392	7.9913	11.2019
0	2.6966	4.628	6.5905
0	3.7073	12.1558	12.1005
0	3.1174	1.8098	13.4307
0	4.9486	2.7271	12.1094
Cyp2e1 area
Day 2	Day 3	Day 5	Day 7
6.9925	13.322	5.4494	6.6627
1.9284	13.2307	14.4483	4.4826
1.6347	13.2307	9.3012	9.3233
3.4938	13.1085	16.9825	20.427
3.6314	3.4946	7.8416	9.7611
4.4322	9.5958	10.9281	10.9003
2.6827	4.5252	10.8413	14.2293
2.4909	9.9727	18.7805	19.1787
2.389	7.8612	11.7966	20.9216
		8.8595
		7.6065
GFP area
Day 2	Day 3	Day 5	Day 7
6.5329	12.3416	5.2145	5.5993
2.9167	12.156	11.1834	4.3757
1.9422	11.3956	8.4389	8.2502
3.9636	12.0794	16.1334	15.6901
3.6515	4.164	5.8892	7.4593
3.9296	7.6246	8.1861	9.4534
2.2087	4.3386	8.3637	11.8791
3.0432	7.9431	13.556	17.6247
2.4309	8.6893	11.4334	19.8133
		7.3884
		5.2936
GFP+/Cyp2e1+ area
Day 2	Day 3	Day 5	Day 7
93.4273	92.6407	95.6894	84.0395
151.25	91.8772	77.4029	97.6152
118.811	86.13	90.7292	88.4901
113.447	92.1494	95.0001	76.8106
100.553	119.155	75.102	76.4186
88.6603	79.4577	74.9087	86.7261
82.3312	95.8764	77.1466	83.4834
122.173	79.6484	72.1813	91.8973
101.754	110.534	96.9211	94.7026
		83.3952
		69.5931

## Sheet: Figure 4F 
Figure 4F
Edu+/Cyp2e1 area
2 hr chase	120 hr chase
18.0603	0.0839046
18.9894	2.04684
12.189	0.91262
13.0418	0.787139
18.3993	1.4269
11.616	0.843234
11.5311	1.75973
9.34374	1.64865
10.8391	1.02404
	1.02503
Edu+/Ecad area
2 hr chase	120 hr chase
1.30551	0.446483
2.09187	0.847047
1.83202	1.44064
1.8233	0.934492
1.56969	0.317357
1.45159	0.478328
3.0825	0.43261
2.19432	0.143652
3.24131	0.689405
1.88015	0.781041
1.12214	1.35178
	0.421459
	0.0532774
	0.297378
