# Supplementary material for: Metabolic and non-metabolic liver zonation is established non-synchronously and requires sinusoidal Wnts
Source: eLife. 2020 Mar 10;9:e46206. doi: 10.7554/eLife.46206 (PMC7067564; doi:10.7554/eLife.46206)
Supplement: Figure 5—source data 1. [file elife-46206-fig5-data1.xlsx]

## Sheet: Figure 5E
Figure 5E
F4/80 area
Day 2	Day 3	Day 5
7.382	8.42	21.767
5.088	23.237	12.55
7.686	27.047	8.676
6.903	11.766	9.821
11.763	30.43	16.157
7.698	46.65	8.051
10.138	38.34	22.907
9.755	15.974	33.963
22.492	25.923	8.348
11.639	39.655	13.746
5.107	34.621	5.461
10.829	32.415
	39.953
