# Supplementary material for: Metabolic and non-metabolic liver zonation is established non-synchronously and requires sinusoidal Wnts
Source: eLife. 2020 Mar 10;9:e46206. doi: 10.7554/eLife.46206 (PMC7067564; doi:10.7554/eLife.46206)
Supplement: Figure 6—source data 1. [file elife-46206-fig6-data1.xlsx]

## Sheet: Figure 6B
Figure 6B
ALT activity (mU/mL)					GS area
Ctrl/Veh.	Ctrl/CCl4	Mut/CCl4			Ctrl	Mut
35.3929	387.267	408.794			1.3207	0.274
33.737	547.06	388.923			2.1839	0.1361
41.1885	357.462	398.859			2.813	0.1557
					1.1447	0.0679
AST activity (mU/mL)					1.8622	0.1257
Ctrl/Veh.	Ctrl/CCl4	Mut/CCl4			1.1654	0.1075
29.021	146.278	126.225			0.8726	0.2187
34.5914	110.627	127.617			2.0161
40.7189	115.641	133.466			2.1622
					0.9054
					Cyp2e1 area
					Ctrl	Mut
					17.4177	5.7908
					18.728	1.4819
					13.1958	3.1675
					19.7627	1.9081
					12.5449	2.9377
					18.2083	1.8049
					14.4369	3.6583
					10.3397	5.0754
					15.1034	2.5181
						3.8762
						2.3106
						2.3059

## Sheet: Figure 6E
Lyve1
Control		CCL4
CD117+ CD31+	Lyve1+ CD31+	CD117+ CD31+	Lyve1+ CD31+
2.96544	4.39939	2.71913	1.80507
1.32932	2.58028	4.66162	3.34748
2.76789	1.91399	2.658	2.43147
CD117
Control		CCL4
CD117+ CD31+	Lyve1+ CD31+	CD117+ CD31+	Lyve1+ CD31+
0.712516	0.136431	0.0178667	0.00682917
0.0575539	0.094964	0.0390708	0.0117337
0.0611309	0.0495859	0.0242766	0.012412
Wnt2
Control		CCL4
CD117+ CD31+	Lyve1+ CD31+	CD117+ CD31+	Lyve1+ CD31+
0.15904	0.21042	0.511499	0.174302
0.185155	0.311846	1.50043	0.671303
0.188713	0.209179	0.925596	0.40485
Wnt9
Control		CCL4
CD117+ CD31+	Lyve1+ CD31+	CD117+ CD31+	Lyve1+ CD31+
	0.00339932	0.0307831	0.00452851
0.00262675	0.0002052	0.0713001	0.0303675
0.00643766	0.00017848	0.043313	0.0253078
Rspo3
Control		CCL4
CD117+ CD31+	Lyve1+ CD31+	CD117+ CD31+	Lyve1+ CD31+
0.0466281	0.00923474	0.0723106	0.00977338
0.0142559	0.00653976	0.465243	0.29012
0.0142381	0.00366541	0.375879	0.166313
