# Supplementary material for: Metabolic and non-metabolic liver zonation is established non-synchronously and requires sinusoidal Wnts
Source: eLife. 2020 Mar 10;9:e46206. doi: 10.7554/eLife.46206 (PMC7067564; doi:10.7554/eLife.46206)
Supplement: Figure 7—source data 1. [file elife-46206-fig7-data1.xlsx]

## Sheet: Figure 7C
Figure 7C
ALT activity (mU/mL)
Ctrl/Veh.	Ctrl/CCl4	Mut/CCl4
57.3868	216.561	59.2465
58.9751	315.917	56.062
64.2696	238.852	55.4251
49.9745	315.28	46.5085
AST activity (mU/mL)
Ctrl/Veh.	Ctrl/CCl4	Mut/CCl4
72.6815	102.067	66.5104
61.0236	110.389	67.6452
26.9181	115.118	67.0778
32.251	117.009	70.4822
